# Supplementary material for: Neutrophils induce paracrine telomere dysfunction and senescence in ROS‐dependent manner
Source: PubMed Central journal article supplement (PMC8090854; doi:10.15252/embj.2020106048), 2021-03-25
Supplement: EMBJ-40-e106048-s002.pdf [file EMBJ-40-e106048-s002.pdf]

# uncropped western blots Fig1h

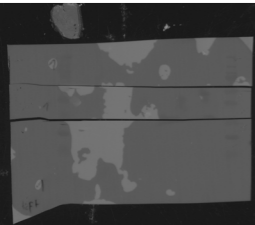

50

37

25

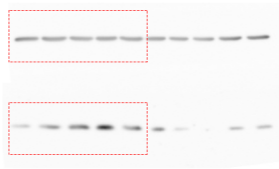

**GAPDH**

**p21**
