# Supplementary material for: Neutrophils induce paracrine telomere dysfunction and senescence in ROS‐dependent manner
Source: PubMed Central journal article supplement (PMC8090854; doi:10.15252/embj.2020106048), 2021-03-25
Supplement: EMBJ-40-e106048-s003.pdf [file EMBJ-40-e106048-s003.pdf]

Table of contents:

2 Appendix Supplementary Figures

1 Appendix Supplementary Table

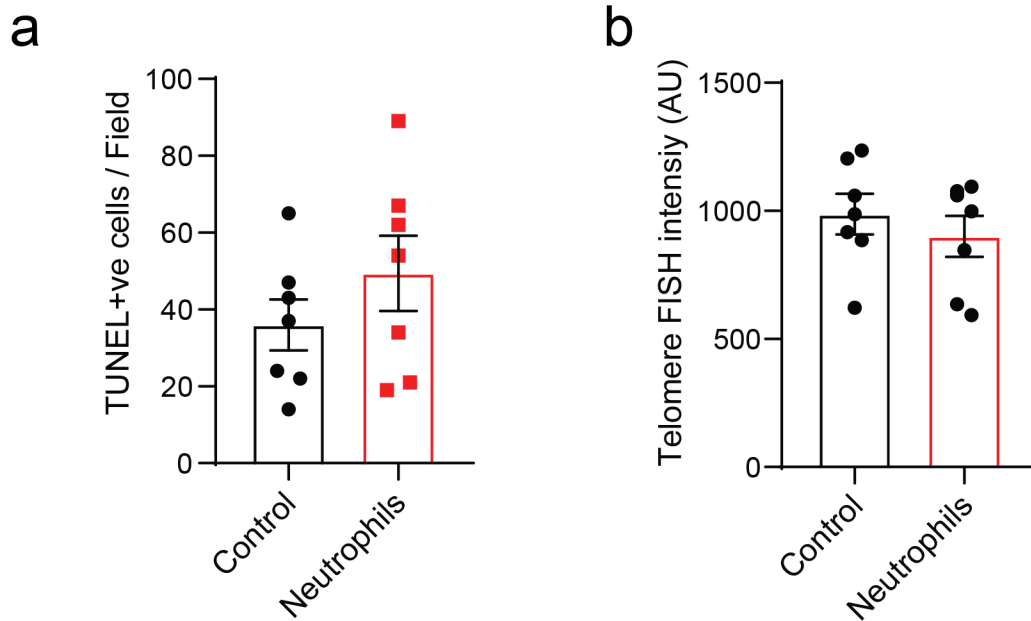

**Appendix Figure S1. Neutrophils do not induce cell-death or telomere shortening in human precision cut liver slices (PCLS).** a) Number of TUNEL stained positive cells per field; b) Mean telomere FISH intensity. Data are from n=7 patients.

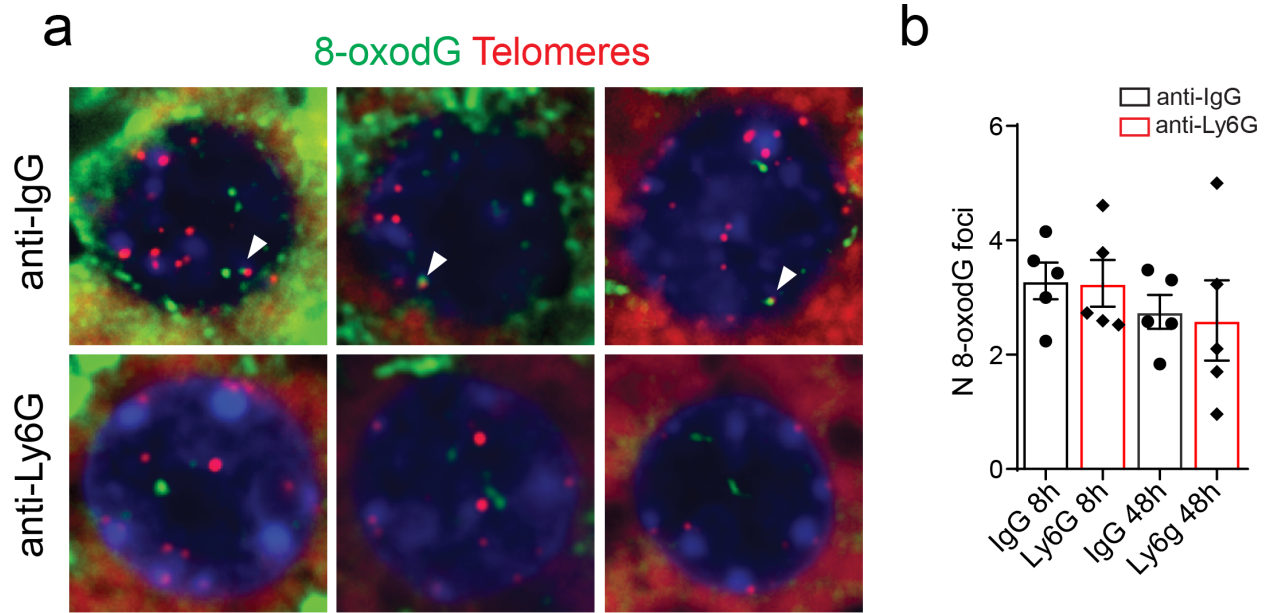

**Appendix Figure S2. Neutrophil depletion reduces telomere-associated 8-oxodG foci, but not total 8-oxodG foci** **a)** Representative immuno-FISH micrographs using antibody against 8-oxodG and Cy-3-labelled telomere-specific (CCCTAA) peptide nucleic acid probe in hepatocytes 8 and 48 hours after injection of CCl<sub>4</sub> pre-treated with neutrophil neutralizing antibody against Ly6G (or with IgG control); **b)** graph shows quantification of total number of nuclear 8-oxodG foci.

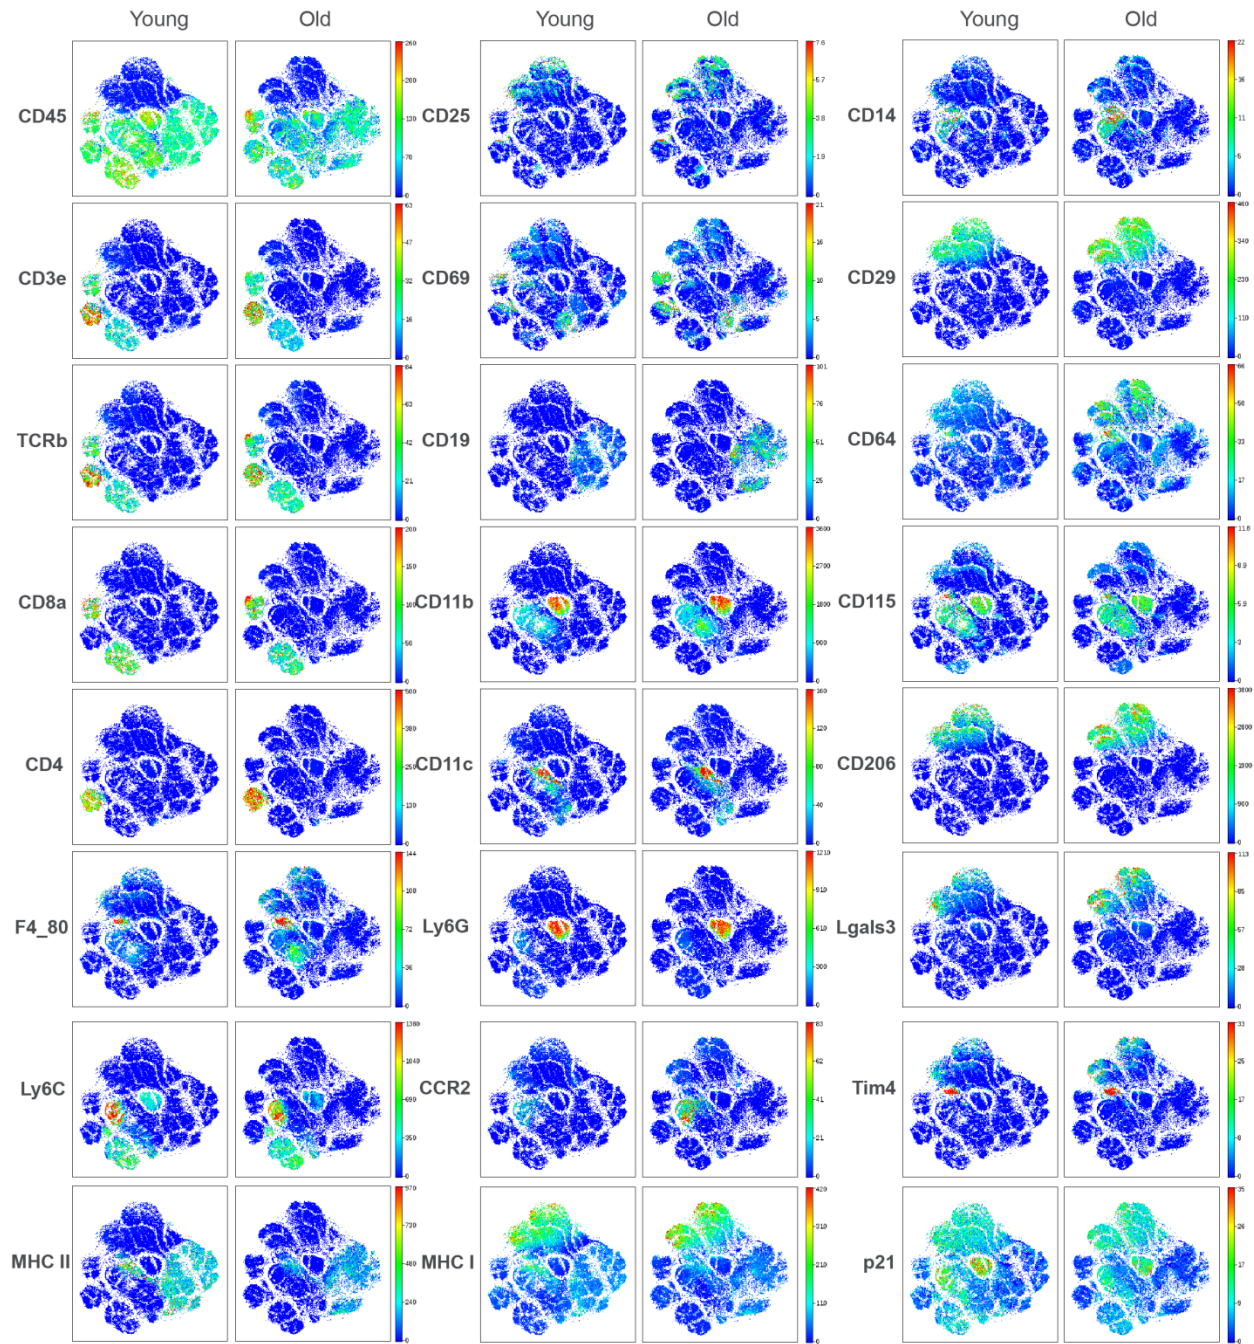

**Appendix Figure S3- Intrahepatic leukocyte profiling by mass CyTOF.** Representative tSNE plots for each marker used. Red indicates high frequency categorization of cells to a cluster; blue indicates low frequency; n = 5 per age group.

| Species | Label | Target        | Clone       | Company        | Cat. #   |
|---------|-------|---------------|-------------|----------------|----------|
| Ms      | 089Y  | CD45          | 30-F11      | Fluidigm       | 3089005B |
| Ms      | 141Pr | Lgals3        | 202213      | R&D Systems    | MAB1197  |
| Ms      | 142Nd | CD11c         | N418        | Fluidigm       | 3142003B |
| Ms      | 143Nd | TCRb          | H57-597     | Fluidigm       | 3143010B |
| Ms      | 144Nd | MHC Class I   | 28-14-8     | Fluidigm       | 3144016B |
| Ms      | 145Nd | CD69          | H1.2F3      | Fluidigm       | 3144016B |
| Ms      | 149Sm | Tim4          | RMT4-54     | BioLegend      | 130002   |
| Ms      | 151Eu | CD25 (IL-2R)  | 3C7         | Fluidigm       | 3150002B |
| Ms      | 152Sm | CD3e          | 145-2C11    | Fluidigm       | 3152004B |
| Ms      | 153Eu | CD29 / Itgb1  | 9EG7        | BD Biosciences | 550531   |
| Ms      | 156Gd | CCR2          | 475301      | R&D Systems    | MAB55381 |
| Ms      | 159Tb | F4/80         | BM8         | Fluidigm       | 3159009B |
| Ms      | 160Gd | CD64          | 290322      | R&D Systems    | MAB20741 |
| Ms      | 161Dy | Ly6G          | 1A8         | Biolegend      | 127637   |
| Ms      | 163Dy | CD4           | RM4-5       | Biolegend      | 100561   |
| Ms      | 165Ho | CD14          | Sa14-2      | Biolegend      | 123321   |
| Ms      | 166Er | CD19          | 6D5         | Fluidigm       | 3166015B |
| Ms      | 168Er | CD8a          | 53-6.7      | Fluidigm       | 3168003B |
| Ms      | 169Tm | CD206 (MMR)   | C068C2      | Fluidigm       | 3169021B |
| Ms      | 171Yb | CD11b (Mac-1) | M1/70       | Biolegend      | 101249   |
| Ms      | 174Yb | CD115/CSF1R   | AFS98       | Biolegend      | 135521   |
| Ms      | 175Lu | Ly6C          | HK1.4       | Biolegend      | 128039   |
| Ms      | 209Bi | I-A/I-E       | M5/114.15.2 | Fluidigm       | 3209006B |
| Ms      | 155Gd | p16           | EPR20418    | Abcam          | ab232402 |
| Ms      | 176Yb | p21           | F-5         | Santa Cruz     | sc-6246  |

**Appendix Table S1: Table of antibodies used for CyTOF.**
